# Supplementary material for: SNP Discovery in the Transcriptome of White Pacific Shrimp Litopenaeus vannamei by Next Generation Sequencing
Source: PLoS One. 2014 Jan 30;9(1):e87218. doi: 10.1371/journal.pone.0087218 (PMC3907553; doi:10.1371/journal.pone.0087218)
Supplement: Table S1 — KEGG pathway of annotated SNPs. (XLSX) [file pone.0087218.s001.xlsx]

## Sheet: total SNP KEGG pathway
KEGG pathway	SNP number assigned to KEGG pathway
Metabolic pathways	1360
Amoebiasis	769
Vibrio cholerae infection	707
RNA transport	598
Regulation of actin cytoskeleton	501
mRNA surveillance pathway	439
Focal adhesion	373
Spliceosome	318
Pathways in cancer	317
Vascular smooth muscle contraction	278
Salmonella infection	277
Hypertrophic cardiomyopathy (HCM)	261
Dilated cardiomyopathy	255
Pathogenic Escherichia coli infection	252
Phagosome	249
Purine metabolism	241
Protein processing in endoplasmic reticulum	239
Influenza A	233
Tight junction	232
Lysosome	221
ECM-receptor interaction	218
Endocytosis	218
Adherens junction	218
Protein digestion and absorption	212
Huntington's disease	210
Salivary secretion	204
Amyotrophic lateral sclerosis (ALS)	200
Viral myocarditis	196
HTLV-I infection	192
MAPK signaling pathway	191
Bacterial invasion of epithelial cells	188
Shigellosis	187
Herpes simplex infection	185
Lysine degradation	183
Tuberculosis	182
Pancreatic secretion	181
Ubiquitin mediated proteolysis	174
Pyrimidine metabolism	171
Cardiac muscle contraction	168
Neuroactive ligand-receptor interaction	168
Alzheimer's disease	165
Ribosome biogenesis in eukaryotes	164
Transcriptional misregulation in cancer	164
Fc gamma R-mediated phagocytosis	163
Calcium signaling pathway	161
Chemokine signaling pathway	160
Gastric acid secretion	148
Peroxisome	145
Cell cycle	138
Axon guidance	131
Insulin signaling pathway	127
Toxoplasmosis	120
Wnt signaling pathway	118
Olfactory transduction	118
Leukocyte transendothelial migration	118
Parkinson's disease	111
Amino sugar and nucleotide sugar metabolism	111
Bile secretion	110
RNA polymerase	107
Oxidative phosphorylation	106
Complement and coagulation cascades	104
Measles	103
Phototransduction	102
Dorso-ventral axis formation	101
Small cell lung cancer	99
Arrhythmogenic right ventricular cardiomyopathy (ARVC)	95
Phosphatidylinositol signaling system	95
Glycerophospholipid metabolism	92
Oocyte meiosis	91
Hematopoietic cell lineage	90
Cell adhesion molecules (CAMs)	89
Pertussis	89
GABAergic synapse	88
RNA degradation	86
Dopaminergic synapse	86
Neurotrophin signaling pathway	83
Vitamin digestion and absorption	82
Prostate cancer	82
Hedgehog signaling pathway	82
Staphylococcus aureus infection	82
Glutathione metabolism	80
Glycerolipid metabolism	80
Morphine addiction	80
Prion diseases	80
Starch and sucrose metabolism	79
Tyrosine metabolism	78
Inositol phosphate metabolism	78
Legionellosis	77
Retinol metabolism	76
Retrograde endocannabinoid signaling	75
Serotonergic synapse	75
T cell receptor signaling pathway	74
Phototransduction - fly	73
Melanogenesis	72
Nucleotide excision repair	71
GnRH signaling pathway	71
Metabolism of xenobiotics by cytochrome P450	71
Progesterone-mediated oocyte maturation	69
Aminoacyl-tRNA biosynthesis	68
ABC transporters	68
Drug metabolism - other enzymes	68
Valine, leucine and isoleucine degradation	67
Glutamatergic synapse	67
Basal transcription factors	67
VEGF signaling pathway	67
Cholinergic synapse	66
TGF-beta signaling pathway	66
Ribosome	66
Drug metabolism - cytochrome P450	65
Fat digestion and absorption	65
Base excision repair	65
Renal cell carcinoma	64
Notch signaling pathway	64
Jak-STAT signaling pathway	64
Cytosolic DNA-sensing pathway	64
Synaptic vesicle cycle	63
PPAR signaling pathway	63
Glycolysis / Gluconeogenesis	62
Gap junction	62
p53 signaling pathway	61
Adipocytokine signaling pathway	61
Arachidonic acid metabolism	61
Fatty acid metabolism	60
Antigen processing and presentation	60
Hepatitis C	58
Glycine, serine and threonine metabolism	58
Galactose metabolism	58
ErbB signaling pathway	58
Cysteine and methionine metabolism	58
Pyruvate metabolism	57
Arginine and proline metabolism	57
Fructose and mannose metabolism	56
Nicotine addiction	56
Basal cell carcinoma	56
Pentose and glucuronate interconversions	55
B cell receptor signaling pathway	55
Epithelial cell signaling in Helicobacter pylori infection	55
Chagas disease (American trypanosomiasis)	54
Chronic myeloid leukemia	54
Natural killer cell mediated cytotoxicity	53
DNA replication	53
Amphetamine addiction	53
Glioma	52
Other types of O-glycan biosynthesis	52
Long-term potentiation	51
mTOR signaling pathway	51
N-Glycan biosynthesis	50
Fanconi anemia pathway	49
Steroid hormone biosynthesis	49
Osteoclast differentiation	49
Propanoate metabolism	49
Apoptosis	49
Mineral absorption	49
Tryptophan metabolism	48
Butanoate metabolism	48
Colorectal cancer	48
Sphingolipid metabolism	48
Citrate cycle (TCA cycle)	48
Malaria	47
Toll-like receptor signaling pathway	46
Pancreatic cancer	46
Cytokine-cytokine receptor interaction	45
Carbohydrate digestion and absorption	44
Other glycan degradation	43
Leishmaniasis	42
Fc epsilon RI signaling pathway	42
Glycosaminoglycan biosynthesis - chondroitin sulfate	41
beta-Alanine metabolism	41
Endometrial cancer	40
Systemic lupus erythematosus	39
Linoleic acid metabolism	39
Rheumatoid arthritis	39
Long-term depression	39
Porphyrin and chlorophyll metabolism	38
NOD-like receptor signaling pathway	38
Renin-angiotensin system	37
Glycosaminoglycan degradation	37
Alanine, aspartate and glutamate metabolism	37
Vasopressin-regulated water reabsorption	37
Insect hormone biosynthesis	36
Sulfur metabolism	36
Mismatch repair	35
Fatty acid elongation	35
Ascorbate and aldarate metabolism	35
Biosynthesis of unsaturated fatty acids	33
alpha-Linolenic acid metabolism	32
Phenylalanine metabolism	31
Acute myeloid leukemia	31
Type II diabetes mellitus	31
Ether lipid metabolism	31
Proteasome	30
Bladder cancer	30
Cocaine addiction	30
Non-small cell lung cancer	30
Glycosylphosphatidylinositol(GPI)-anchor biosynthesis	28
Glycosaminoglycan biosynthesis - keratan sulfate	26
Folate biosynthesis	26
Homologous recombination	26
Nicotinate and nicotinamide metabolism	26
Riboflavin metabolism	26
Melanoma	26
Pentose phosphate pathway	25
Glyoxylate and dicarboxylate metabolism	25
RIG-I-like receptor signaling pathway	24
Histidine metabolism	24
Protein export	24
Circadian rhythm - mammal	23
Proximal tubule bicarbonate reclamation	23
Endocrine and other factor-regulated calcium reabsorption	22
Pantothenate and CoA biosynthesis	21
MAPK signaling pathway - fly	21
Sulfur relay system	21
Autoimmune thyroid disease	21
Steroid biosynthesis	20
Regulation of autophagy	20
SNARE interactions in vesicular transport	18
Circadian rhythm - fly	18
Collecting duct acid secretion	18
Terpenoid backbone biosynthesis	18
One carbon pool by folate	18
Mucin type O-Glycan biosynthesis	17
Ubiquinone and other terpenoid-quinone biosynthesis	17
Thyroid cancer	17
Glycosaminoglycan biosynthesis - heparan sulfate	17
Primary immunodeficiency	17
Glycosphingolipid biosynthesis - globo series	17
Non-homologous end-joining	16
Glycosphingolipid biosynthesis - ganglio series	16
Aldosterone-regulated sodium reabsorption	15
Glycosphingolipid biosynthesis - lacto and neolacto series	13
Cyanoamino acid metabolism	12
Type I diabetes mellitus	12
Taurine and hypotaurine metabolism	12
Primary bile acid biosynthesis	11
Taste transduction	10
Fatty acid biosynthesis	10
Synthesis and degradation of ketone bodies	10
Selenocompound metabolism	10
Caffeine metabolism	9
Lysine biosynthesis	8
African trypanosomiasis	8
Intestinal immune network for IgA production	7
Valine, leucine and isoleucine biosynthesis	7
Lipoic acid metabolism	6
Maturity onset diabetes of the young	5
Phenylalanine, tyrosine and tryptophan biosynthesis	5
D-Arginine and D-ornithine metabolism	3
Biotin metabolism	3
Allograft rejection	3
Graft-versus-host disease	2
Vitamin B6 metabolism	2
D-Glutamine and D-glutamate metabolism	2
Thiamine metabolism	2
Butirosin and neomycin biosynthesis	2

## Sheet: greater0.014 SNP KEGG pathway
Metabolic pathways	36
Vibrio cholerae infection	29
Amoebiasis	26
Phagosome	15
Pathogenic Escherichia coli infection	14
Protein processing in endoplasmic reticulum	12
RNA transport	12
Focal adhesion	12
Lysosome	12
Shigellosis	10
mRNA surveillance pathway	10
Spliceosome	10
Regulation of actin cytoskeleton	10
ECM-receptor interaction	9
Pathways in cancer	9
Protein digestion and absorption	9
Purine metabolism	9
Bacterial invasion of epithelial cells	9
Huntington's disease	8
Endocytosis	8
Salmonella infection	8
Influenza A	8
Leukocyte transendothelial migration	8
Hypertrophic cardiomyopathy (HCM)	8
Dilated cardiomyopathy	8
Tuberculosis	7
Tight junction	7
Arrhythmogenic right ventricular cardiomyopathy (ARVC)	7
Pancreatic secretion	7
Amino sugar and nucleotide sugar metabolism	7
Pyrimidine metabolism	7
RNA polymerase	7
Olfactory transduction	6
Viral myocarditis	6
Adherens junction	6
Phototransduction - fly	5
Alzheimer's disease	5
Amyotrophic lateral sclerosis (ALS)	5
Vascular smooth muscle contraction	5
Antigen processing and presentation	5
Gastric acid secretion	5
Cell adhesion molecules (CAMs)	4
Phototransduction	4
Parkinson's disease	4
Hematopoietic cell lineage	4
Lysine degradation	4
Arachidonic acid metabolism	4
Small cell lung cancer	4
Neuroactive ligand-receptor interaction	4
Toxoplasmosis	3
Vitamin digestion and absorption	3
Valine, leucine and isoleucine degradation	3
Neurotrophin signaling pathway	3
Prostate cancer	3
Measles	3
Ribosome biogenesis in eukaryotes	3
Glycosaminoglycan degradation	3
Fatty acid metabolism	3
Propanoate metabolism	3
Staphylococcus aureus infection	3
Peroxisome	3
Drug metabolism - cytochrome P450	3
Cell cycle	3
Complement and coagulation cascades	3
Malaria	3
Glutathione metabolism	3
Axon guidance	3
Cytosolic DNA-sensing pathway	3
Bile secretion	3
Oxidative phosphorylation	3
Metabolism of xenobiotics by cytochrome P450	3
Fanconi anemia pathway	2
Tryptophan metabolism	2
Wnt signaling pathway	2
Fc gamma R-mediated phagocytosis	2
Butanoate metabolism	2
Salivary secretion	2
alpha-Linolenic acid metabolism	2
Glycine, serine and threonine metabolism	2
Chemokine signaling pathway	2
Sulfur relay system	2
Galactose metabolism	2
Retinol metabolism	2
Ubiquitin mediated proteolysis	2
HTLV-I infection	2
Basal cell carcinoma	2
Starch and sucrose metabolism	2
Leishmaniasis	2
Gap junction	2
Carbohydrate digestion and absorption	2
beta-Alanine metabolism	2
MAPK signaling pathway	2
Cysteine and methionine metabolism	2
One carbon pool by folate	2
Pertussis	2
Pentose phosphate pathway	2
Glyoxylate and dicarboxylate metabolism	2
Biosynthesis of unsaturated fatty acids	2
PPAR signaling pathway	2
Herpes simplex infection	2
Prion diseases	2
Retrograde endocannabinoid signaling	1
Fructose and mannose metabolism	1
Steroid hormone biosynthesis	1
p53 signaling pathway	1
Aminoacyl-tRNA biosynthesis	1
Legionellosis	1
Nicotine addiction	1
Glycolysis / Gluconeogenesis	1
Cyanoamino acid metabolism	1
Folate biosynthesis	1
Glycerophospholipid metabolism	1
ABC transporters	1
Oocyte meiosis	1
Mucin type O-Glycan biosynthesis	1
RNA degradation	1
Linoleic acid metabolism	1
Tyrosine metabolism	1
Insulin signaling pathway	1
Cholinergic synapse	1
TGF-beta signaling pathway	1
Ubiquinone and other terpenoid-quinone biosynthesis	1
Melanogenesis	1
Hedgehog signaling pathway	1
GABAergic synapse	1
ErbB signaling pathway	1
Alanine, aspartate and glutamate metabolism	1
Adipocytokine signaling pathway	1
Acute myeloid leukemia	1
Citrate cycle (TCA cycle)	1
Fatty acid elongation	1
Fat digestion and absorption	1
Arginine and proline metabolism	1
Glycosaminoglycan biosynthesis - heparan sulfate	1
Glioma	1
GnRH signaling pathway	1
Glycerolipid metabolism	1
Transcriptional misregulation in cancer	1
Drug metabolism - other enzymes	1
Type II diabetes mellitus	1
Base excision repair	1
Cardiac muscle contraction	1
Morphine addiction	1
Progesterone-mediated oocyte maturation	1
African trypanosomiasis	1
Dorso-ventral axis formation	1
Mineral absorption	1
mTOR signaling pathway	1

## Sheet: Sheet1
Amoebiasis	Amoebiasis
Dilated cardiomyopathy	Bacterial invasion of epithelial cells
Focal adhesion	ECM-receptor interaction
Hypertrophic cardiomyopathy (HCM)	Endocytosis
Influenza A	Focal adhesion
Lysosome	Huntington's disease
Metabolic pathways	Lysosome
mRNA surveillance pathway	Metabolic pathways
Pathogenic Escherichia coli infection	mRNA surveillance pathway
Pathways in cancer	Pathogenic Escherichia coli infection
Phagosome	Pathways in cancer
Protein processing in endoplasmic reticulum	Phagosome
Purine metabolism	Protein digestion and absorption
Regulation of actin cytoskeleton	Protein processing in endoplasmic reticulum
RNA transport	Purine metabolism
Salmonella infection	Regulation of actin cytoskeleton
Spliceosome	RNA transport
Tight junction	Shigellosis
Vascular smooth muscle contraction	Spliceosome
Vibrio cholerae infection	Vibrio cholerae infection
