# Supplementary material for: SNP Discovery in the Transcriptome of White Pacific Shrimp Litopenaeus vannamei by Next Generation Sequencing
Source: PLoS One. 2014 Jan 30;9(1):e87218. doi: 10.1371/journal.pone.0087218 (PMC3907553; doi:10.1371/journal.pone.0087218)
Supplement: Table S2 — The SNPs validated by Sanger sequencing. (XLSX) [file pone.0087218.s002.xlsx]

## Sheet: Sheet1
Table S1 The SNPs validated by sanger sequencing. Quality Score is representative of predicting accuracy of SNPs discovered by SAMtools and Bcftools. Also, the annotation information is represented.
Unigene	SNP position	SNP format	Quality Score	Annotation(nr)
Unigene9278_hn-M	130	T/C	78.2	dorsal [Litopenaeus vannamei]
Unigene9211_hn-M	840	T/C	29.2	antiviral protein [Penaeus monodon]
Unigene6225_hn-M	814	T/C	999	tumor necrosis factor receptor-associated factor 6 [Litopenaeus vannamei]
Unigene600_hn-M	391	A/G	52	Phosphatidylinositol 3-kinase regulatory subunit alpha [Camponotus floridanus]
Unigene5217_hn-M	138	G/A	169	anti-lipopolysaccharide AV-R isoform [Litopenaeus vannamei]
Unigene4952_hn-M	794	G/A	999	acid phosphatase isoenzyme [Danaus plexippus]
Unigene13486_hn-M	145	G/C	76.3	peroxidasin [Tribolium castaneum]
Unigene34457_hn-M	794	A/G	204	PREDICTED: heat shock factor protein-like [Megachile rotundata]
Unigene2997_hn-M	1687	T/C	148	suppressor of cytokine signaling-2 like protein [Marsupenaeus japonicus]
Unigene2997_hn-M	1225	G/A	227	suppressor of cytokine signaling-2 like protein [Marsupenaeus japonicus]
Unigene18765_hn-M	526	T/C	59	putative myosin head [Trichinella spiralis]
Unigene18765_hn-M	526	T/C	59	putative myosin head [Trichinella spiralis]
Unigene18352_hn-M	233	A/G	308	PMAV [Penaeus monodon]
Unigene1791_hn-M	1185	T/A	63.2	purple acid phosphatase, putative [Ixodes scapularis]
Unigene17818_hn-M	335	T/A	75.2	PREDICTED: peroxidasin homolog [Anolis carolinensis]
Unigene15313_hn-M	1912	G/A	147	phosphoinositide 3-kinase isoform b [Panulirus argus]
Unigene15221_hn-M	2293	C/T	146	PREDICTED: helicase SKI2W-like [Anolis carolinensis]
Unigene15088_hn-M	865	A/T	93.2	suppressor of cytokine signaling 7 [Apis mellifera]
Unigene14744_hn-M	1853	T/C	168	toll, putative [Pediculus humanus corporis]
Unigene1293_hn-M	274	T/A	46	putative antimicrobial peptide [Litopenaeus setiferus]
Unigene10939_hn-M	874	A/C	366	Toll protein [Litopenaeus vannamei]
CL261.Contig1_hn-M	4099	T/A	52	PREDICTED: chaoptin-like [Megachile rotundata]
Unigene600_hn-M	1117	C/A	999	PREDICTED: hypothetical protein LOC408577 [Apis mellifera]
Unigene5713_hn-M	96	C/T	87.2	inhibitor of apoptosis protein [Litopenaeus vannamei]
Unigene5350_hn-M	909	C/T	131	toll [Aedes aegypti]
Unigene2997_hn-M	411	T/C	295	suppressor of cytokine signaling-2 like protein [Marsupenaeus japonicus]
